# Supplementary material for: Hitze-Beratung in der ambulanten Pflege
Source: Springer Nature journal article supplement (doi:10.1007/s00058-022-2272-8), 2022-05-01
Supplement: MOESM1 [file 20361794]

## Literatur

### zum Beitrag „Hitze-Beratung in der ambulanten Pflege“ von Cindy Steinhöfel

*Heilberufe (74) 5/2022, S. 27-28*

- [1] Lancet-Countdown on Health and Climate Change. Policy Brief für Deutschland (2021). Im Internet: [https://www.klimawandel-gesundheit.de/wp-content/uploads/2021/10/20211020\\_Lancet-Countdown-Policy-Germany-2021\\_Document\\_v2.pdf](https://www.klimawandel-gesundheit.de/wp-content/uploads/2021/10/20211020_Lancet-Countdown-Policy-Germany-2021_Document_v2.pdf); Zugriff: 20.01.2022
- [2] Jung L. Public Health im Blick auf globale Umweltveränderungen. In: Traidl-Hoffmann C. et al. (Hrsg.). Planetary Health. Berlin: Medizinisch Wissenschaftliche Verlagsgesellschaft; 2021: 27-32
- [3] Bauer J; Becker C. Geriatrie - neue Herausforderungen für die medizinische Versorgung von älteren Menschen. In: Traidl-Hoffmann C. et al. (Hrsg.). Planetary Health. Berlin: Medizinisch Wissenschaftliche Verlagsgesellschaft; 2021: 122-130
- [4] Bundesministerium für Umwelt, Naturschutz, Bau und Reaktorsicherheit. Handlungsempfehlungen für die Erstellung von Hitzeaktionsplänen zum Schutz der menschlichen Gesundheit (14.03.2017). Im Internet: [https://www.bmu.de/fileadmin/Daten\\_BMU/Download\\_PDF/Klimaschutz/hap\\_handlungsempfehlungen\\_bf.pdf](https://www.bmu.de/fileadmin/Daten_BMU/Download_PDF/Klimaschutz/hap_handlungsempfehlungen_bf.pdf); Zugriff: 21.01.2022
- [5] An der Heiden, M, Buchholz U, Uphoff, H. Schätzung der Zahl hitzebedingter Sterbefälle und Betrachtung der Exzess-Mortalität; Berlin und Hessen, Sommer 2018. Epidemiologisches Bulletin Nr. 23 (06.06.2019). Im Internet: [https://edoc.rki.de/bitstream/handle/176904/6205/23\\_2019\\_Artikel.pdf?sequence=1&isAllowed=y](https://edoc.rki.de/bitstream/handle/176904/6205/23_2019_Artikel.pdf?sequence=1&isAllowed=y); Zugriff: 25.01.2022
- [6] Grothmann et al. Der Hitzeknigge. Tipps für das richtige Verhalten bei Hitze (Februar 2021). Im Internet: <https://www.umweltbundesamt.de/sites/default/files/medien/5750/publikationen/210215-hitzeKnigge-allgemein-web.pdf>; Zugriff: 31.01.2022
- [7] International Council of Nurses (ICN). Der ICN-Ethikkodex für Pflegefachpersonen (2021). Im Internet: [https://www.dbfk.de/media/docs/download/Internationales/ICN\\_Code-of-Ethics\\_DE\\_WEB\\_clean.pdf](https://www.dbfk.de/media/docs/download/Internationales/ICN_Code-of-Ethics_DE_WEB_clean.pdf); Zugriff: 14.02.2022
